# Supplementary material
Source: PubMed Central journal article supplement (PMC7027868)
Supplement: PON-29-381-s001.pdf [file PON-29-381-s001.pdf]

## Online Supplementary Material

Figure S1: Samples included in the cross-sectional and prospective analyses for breast and cervical screening

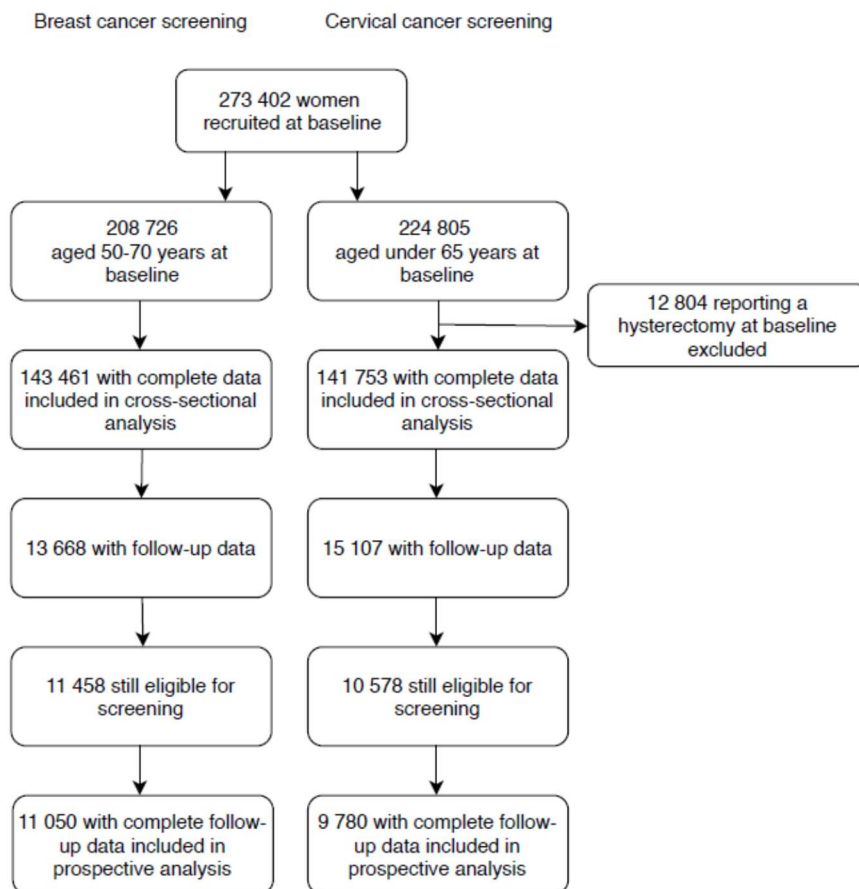

### Data – Repeat Assessment Visit

A repeat assessment of 20,000 participants was carried out between August 2012 and June 2013 at the UK Biobank Co-ordinating Centre, Stockport, UK. Participants who lived within a 35 km radius of the assessment centre were invited via email or letter, with an overall response rate of 21%.<sup>1</sup>

Participants who re-attended the assessment centre tended to have a more advantaged socioeconomic position and be in better overall health.<sup>2</sup>

### Depressive symptoms

As detailed elsewhere<sup>1</sup>, the questionnaire items in UK Biobank assess a) low/depressed mood (“Over the past two weeks, how often have you felt down, depressed or hopeless?”); b) anhedonia or disinterest/unenthusiasm (“Over the past two weeks, how often have you had little interest or pleasure in doing things?”); c) tenseness/restlessness (“Over the past two weeks, how often have you felt tense, fidgety or restless?”) and d) tiredness/lethargy (Over the past two weeks, how often have you felt tired or had little energy?”). Participants responded “not at all”, “several days”, “more than half the days”, or “nearly every day”. Experiencing a symptom nearly every day is considered more severe than experiencing it less often. Items a), b) and d) are derived from the Patient Health Questionnaire-9 (PHQ-9), a depression screening instrument<sup>2</sup>, and item c) is a modified version of a PHQ-9 item (“Over the last two weeks, how often have you been bothered by moving or speaking so slowly that other people could have noticed? Or the opposite – being so fidgety or restless that you have been moving around a lot more than usual?”). A total depressive symptom score from 0 to 12 was calculated from the sum of the scores on each question. A score of 12 indicates that the individual was experiencing all 4 depressive symptoms nearly every day, reflecting more severe depressive symptoms<sup>3</sup>. The Cronbach’s alpha for the four items was 0.77. The measure has been used in previous studies using UK Biobank<sup>1</sup>.

### Potential Confounders

We included several potential baseline confounding variables including sociodemographic factors: age group (5-year age bands); ethnicity defined as white (white British, Irish or other white background), South Asian, Black (Caribbean or African), Chinese, mixed or other; and region of the assessment centre (Scotland, England or Wales). Highest education level was assessed as university or college degree, A-levels or equivalent, General Certificate of Secondary Education (GCSE) or equivalent, vocational Certificate of Secondary Education or equivalent, National Vocational Qualifications (NVQ), Higher National Diploma (HND), Higher National Certificate (HNC), other professional qualifications (e.g. nursing, teaching), or none. Area-level socioeconomic deprivation

was assessed by the Townsend score (incorporating measures of unemployment, non-car ownership, non-home ownership and household overcrowding) corresponding to the output area in which the respondent's home postcode was located. Higher scores on the Townsend score represent greater socioeconomic deprivation<sup>6</sup>. We also included self-reported long-standing illness, disability or infirmity (yes or no) and lifestyle factors including smoking (never, previous, current), Body Mass Index (BMI; a continuous variable calculated as weight/height<sup>2</sup> derived from physical measurements), and alcohol consumption (daily or almost daily, 3-4 times a week, once or twice a week, 1-3 times per month, special occasions, or never). For the prospective analyses, we collapsed the categories of several variables given the smaller sample size (details below).

#### Variables recoded in the prospective analysis

Ethnicity: White versus non-White

Education Level: Degree level versus non-degree level

Region: England versus not in England

Alcohol consumption: Daily (daily or almost daily), regularly (1–2 times a week or 3–4 times a week), occasionally (1–3 times a month or special occasions only), never.

#### Modelling strategy

##### *Cross-sectional:*

Model 1: Neuroticism score, age group, ethnicity, education level, region, long-standing illness and socioeconomic deprivation.

Rationale: Neuroticism + potential confounders

Model 2: Model 1 + depressive symptoms

Rationale: Addition of depressive symptoms as potential mediator between neuroticism and cancer screening

Model 3: Model 2 + smoking + alcohol consumption + BMI

Rationale: Addition of other lifestyle confounders or mediators.

##### *Prospective:*

Model 1: Neuroticism score, depressive symptoms, age group, ethnicity, education level, region, long-standing illness, socioeconomic deprivation and years between baseline and follow-up

Rationale: Interested in association between baseline depressive symptoms and participation in cancer screening at follow-up. Years between baseline and follow-up included as confounder.

Model 2: Model 1 + baseline cancer screening

Rationale: Baseline cancer screening added as potential confounder.

Model 3: Model 2 + smoking + alcohol consumption + BMI

Rationale: Addition of other lifestyle confounders or mediators at baseline.

### Sensitivity analyses

We conducted several sensitivity analyses to test the robustness of our results. The breast cancer screening analyses were repeated excluding participants reporting that they had previously had a mastectomy (N=3 151 in the cross-sectional analyses and N=32 in prospective analyses). We did not exclude these participants at the start of the analysis as women who have had a unilateral mastectomy are still eligible for screening, but there may be a small number who have had a bilateral mastectomy who are no longer eligible. We also repeated the prospective cervical cancer screening analyses excluding participants reporting that they had a hysterectomy at follow-up (N=279). These participants were not excluded in the main analyses as it was not clear at what time point between baseline and follow-up that they had the procedure. In addition, for the breast cancer screening analysis we repeated the models excluding participants aged under 54 years as some women in this younger age group may not have been invited for screening yet. Sensitivity analyses did not affect the substantive results.

Table S1: Descriptive statistics for the cross-sectional samples

|                                  | Up to date with breast cancer screening |          |          |          |          | Up to date with cervical cancer screening |          |          |          |          |
|----------------------------------|-----------------------------------------|----------|----------|----------|----------|-------------------------------------------|----------|----------|----------|----------|
|                                  | No                                      |          | Yes      |          | Total    | No                                        |          | Yes      |          | Total    |
|                                  | Mean                                    | SD       | Mean     | SD       | -        | Mean                                      | SD       | Mean     | SD       | -        |
| <b>Neuroticism</b>               | 4.5                                     | 3.3      | 4.3      | 3.2      | -        | 4.8                                       | 3.3      | 4.5      | 3.2      | -        |
| <b>Depressive symptoms</b>       | 1.9                                     | 2.3      | 1.5      | 2.0      | -        | 2.0                                       | 2.4      | 1.7      | 2.1      | -        |
| <b>Socioeconomic deprivation</b> | -1.1                                    | 3.1      | -1.6     | 2.9      | -        | -1.3                                      | 3.0      | -1.5     | 3.0      | -        |
| <b>Body Mass Index</b>           | 27.2                                    | 5.5      | 27.2     | 5.0      | -        | 27.9                                      | 5.6      | 26.7     | 5.1      | -        |
|                                  |                                         |          |          |          |          |                                           |          |          |          |          |
| <b>Age group</b>                 | <b>N</b>                                | <b>%</b> | <b>N</b> | <b>%</b> | <b>N</b> | <b>N</b>                                  | <b>%</b> | <b>N</b> | <b>%</b> | <b>N</b> |
| <45 years                        | -                                       | -        | -        | -        | -        | 2 169                                     | 11.2     | 17 222   | 88.8     | 19 391   |
| 45-49 years                      | -                                       | -        | -        | -        | -        | 3 437                                     | 13.5     | 21 994   | 86.5     | 25 431   |
| 50-54 years                      | 6 426                                   | 20.8     | 24 516   | 79.2     | 30 942   | 2 960                                     | 10.3     | 25 793   | 89.7     | 28 753   |
| 55-59 years                      | 2 117                                   | 5.9      | 33 497   | 94.1     | 35 614   | 4 522                                     | 14.6     | 26 469   | 85.4     | 30 991   |
| 60-64 years                      | 1 949                                   | 4.3      | 43 536   | 95.7     | 45 485   | 6 380                                     | 17.2     | 30 807   | 82.8     | 37 187   |
| 65+ years                        | 1 973                                   | 6.3      | 29 447   | 93.7     | 31 420   | -                                         | -        | -        | -        | -        |
| Total                            | 12 465                                  | 8.7      | 130 996  | 91.3     | 143 461  | 19 468                                    | 13.7     | 122 285  | 86.3     | 141 753  |
|                                  |                                         |          |          |          |          |                                           |          |          |          |          |
| <b>Ethnicity</b>                 |                                         |          |          |          |          |                                           |          |          |          |          |
| White                            | 11 711                                  | 8.4      | 127 221  | 91.6     | 138 932  | 18 579                                    | 13.7     | 116 747  | 86.3     | 135 326  |
| Mixed or Other                   | 233                                     | 15.7     | 1 247    | 84.3     | 1 480    | 301                                       | 14.2     | 1 820    | 85.8     | 2 121    |
| South Asian                      | 240                                     | 18.8     | 1 035    | 81.2     | 1 275    | 276                                       | 15.8     | 1 468    | 84.2     | 1 744    |
| Black                            | 241                                     | 16.6     | 1 212    | 83.4     | 1 453    | 255                                       | 12.1     | 1 860    | 87.9     | 2 115    |
| Chinese                          | 40                                      | 12.5     | 281      | 87.5     | 321      | 57                                        | 12.8     | 390      | 87.2     | 447      |
| Total                            | 12 465                                  | 8.7      | 130 996  | 91.3     | 143 461  | 19 468                                    | 13.7     | 122 285  | 86.3     | 141 753  |
|                                  |                                         |          |          |          |          |                                           |          |          |          |          |
| <b>Region</b>                    |                                         |          |          |          |          |                                           |          |          |          |          |
| Scotland                         | 1 119                                   | 10.5     | 9 571    | 89.5     | 10 690   | 1 322                                     | 12.0     | 9 712    | 88.0     | 11 034   |
| England                          | 10 829                                  | 8.5      | 115 897  | 91.5     | 126 726  | 17 286                                    | 13.9     | 107 152  | 86.1     | 124 438  |
| Wales                            | 517                                     | 8.6      | 5 528    | 91.4     | 6 045    | 860                                       | 13.7     | 5 421    | 86.3     | 6 281    |

|                                   |               |            |                |             |                |               |             |                |             |                |
|-----------------------------------|---------------|------------|----------------|-------------|----------------|---------------|-------------|----------------|-------------|----------------|
| Total                             | 12 465        | 8.7        | 130 996        | 91.3        | 143 461        | 19 468        | 13.7        | 122 285        | 86.3        | 141 753        |
| <b>Education Level</b>            |               |            |                |             |                |               |             |                |             |                |
| College or University degree      | 4 295         | 9.9        | 39 209         | 90.1        | 43 504         | 6 099         | 11.9        | 45 316         | 88.1        | 51 415         |
| A levels or equivalent            | 1 573         | 9.6        | 14 772         | 90.4        | 16 345         | 2 417         | 12.8        | 16 469         | 87.2        | 18 886         |
| GCSEs or equivalent               | 2 638         | 7.8        | 31 279         | 92.2        | 33 917         | 4 828         | 14.4        | 28 813         | 85.6        | 33 641         |
| CSEs or equivalent                | 687           | 11.6       | 5 246          | 88.4        | 5 933          | 1 226         | 14.7        | 7 135          | 85.3        | 8 361          |
| NVQ or equivalent                 | 593           | 9.1        | 5 924          | 90.9        | 6 517          | 981           | 16.0        | 5 139          | 84.0        | 6 120          |
| Other professional qualifications | 723           | 7.4        | 9 053          | 92.6        | 9 776          | 1 173         | 15.9        | 6 213          | 84.1        | 7 386          |
| None                              | 1 956         | 7.1        | 25 513         | 92.9        | 27 469         | 2 744         | 17.2        | 13 200         | 82.8        | 15 944         |
| Total                             | 12 465        | 8.7        | 130 996        | 91.3        | 143 461        | 19 468        | 13.7        | 122 285        | 86.3        | 141 753        |
| <b>Long-standing illness</b>      |               |            |                |             |                |               |             |                |             |                |
| No                                | 8 512         | 8.6        | 90 174         | 91.4        | 98 686         | 12 817        | 12.3        | 91 305         | 87.7        | 104 122        |
| Yes                               | 3 953         | 8.8        | 40 822         | 91.2        | 44 775         | 6 651         | 17.7        | 30 980         | 82.3        | 37 631         |
| Total                             | 12 465        | 8.7        | 130 996        | 91.3        | 143 461        | 19 468        | 13.7        | 122 285        | 86.3        | 141 753        |
| <b>Smoking</b>                    |               |            |                |             |                |               |             |                |             |                |
| Never                             | 7 099         | 8.5        | 76 333         | 91.5        | 83 432         | 11 517        | 13.5        | 73 592         | 86.5        | 85 109         |
| Previous                          | 3 878         | 7.9        | 45 030         | 92.1        | 48 908         | 5 801         | 13.3        | 37 853         | 86.7        | 43 654         |
| Current                           | 1 488         | 13.4       | 9 633          | 86.6        | 11 121         | 2 150         | 16.6        | 10 840         | 83.4        | 12 990         |
| Total                             | 12 465        | 8.7        | 130 996        | 91.3        | 143 461        | 19 468        | 13.7        | 122 285        | 86.3        | 141 753        |
| <b>Alcohol consumption</b>        |               |            |                |             |                |               |             |                |             |                |
| Daily or almost daily             | 2 023         | 7.8        | 23 766         | 92.2        | 25 789         | 2 845         | 12.1        | 20 641         | 87.9        | 23 486         |
| Three or four times a week        | 2 442         | 8.1        | 27 647         | 91.9        | 30 089         | 3 719         | 11.7        | 28 096         | 88.3        | 31 815         |
| Once or twice a week              | 3 052         | 8.4        | 33 085         | 91.6        | 36 137         | 4 824         | 12.7        | 33 201         | 87.3        | 38 025         |
| One to three times a month        | 1 638         | 9.3        | 15 920         | 90.7        | 17 558         | 2 777         | 14.8        | 15 991         | 85.2        | 18 768         |
| Special occasions only            | 1 966         | 9.5        | 18 732         | 90.5        | 20 698         | 3 179         | 17.1        | 15 449         | 82.9        | 18 628         |
| Never                             | 1 344         | 10.2       | 11 846         | 89.8        | 13 190         | 2 124         | 19.3        | 8 907          | 80.7        | 11 031         |
| <b>Total</b>                      | <b>12 465</b> | <b>8.7</b> | <b>130 996</b> | <b>91.3</b> | <b>143 461</b> | <b>19 468</b> | <b>13.7</b> | <b>122 285</b> | <b>86.3</b> | <b>141 753</b> |

Table S2: Descriptive statistics for the individual neuroticism items and depressive symptoms in the cross-sectional sample

|                                    | Up to date with breast cancer screening |      |         |      |         | Up to date with cervical cancer screening |      |         |      |         |
|------------------------------------|-----------------------------------------|------|---------|------|---------|-------------------------------------------|------|---------|------|---------|
| <b>Neuroticism</b>                 | No                                      | No   | Yes     | Yes  | Total   | No                                        | No   | Yes     | Yes  | Total   |
| <b>Mood swings</b>                 | N                                       | %    | N       | %    | N       | N                                         | %    | N       | %    | N       |
| No                                 | 6,707                                   | 7.9  | 77,898  | 92.1 | 84,605  | 10,004                                    | 13.0 | 66,784  | 87.0 | 76,788  |
| Yes                                | 5,758                                   | 9.8  | 53,098  | 90.2 | 58,856  | 9,464                                     | 14.6 | 55,501  | 85.4 | 64,965  |
| Total                              | 12,465                                  | 8.7  | 130,996 | 91.3 | 143,461 | 19,468                                    | 13.7 | 122,285 | 86.3 | 141,753 |
| <b>Miserableness</b>               |                                         |      |         |      |         |                                           |      |         |      |         |
| No                                 | 6,434                                   | 8.0  | 73,921  | 92.0 | 80,355  | 9,488                                     | 12.9 | 63,899  | 87.1 | 73,387  |
| Yes                                | 6,031                                   | 9.6  | 57,075  | 90.4 | 63,106  | 9,980                                     | 14.6 | 58,386  | 85.4 | 68,366  |
| Total                              | 12,465                                  | 8.7  | 130,996 | 91.3 | 143,461 | 19,468                                    | 13.7 | 122,285 | 86.3 | 141,753 |
| <b>Irritability</b>                |                                         |      |         |      |         |                                           |      |         |      |         |
| No                                 | 9,231                                   | 8.3  | 101,991 | 91.7 | 111,222 | 14,031                                    | 13.5 | 90,090  | 86.5 | 104,121 |
| Yes                                | 3,234                                   | 10.0 | 29,005  | 90.0 | 32,239  | 5,437                                     | 14.4 | 32,195  | 85.6 | 37,632  |
| Total                              | 12,465                                  | 8.7  | 130,996 | 91.3 | 143,461 | 19,468                                    | 13.7 | 122,285 | 86.3 | 141,753 |
| <b>Sensitivity / hurt feelings</b> |                                         |      |         |      |         |                                           |      |         |      |         |
| No                                 | 4,869                                   | 8.8  | 50,332  | 91.2 | 55,201  | 6,972                                     | 12.9 | 47,013  | 87.1 | 53,985  |
| Yes                                | 7,596                                   | 8.6  | 80,664  | 91.4 | 88,260  | 12,496                                    | 14.2 | 75,272  | 85.8 | 87,768  |
| Total                              | 12,465                                  | 8.7  | 130,996 | 91.3 | 143,461 | 19,468                                    | 13.7 | 122,285 | 86.3 | 141,753 |
| <b>Fed-up feelings</b>             |                                         |      |         |      |         |                                           |      |         |      |         |
| No                                 | 7,229                                   | 8.1  | 82,326  | 91.9 | 89,555  | 10,610                                    | 12.8 | 72,215  | 87.2 | 82,825  |
| Yes                                | 5,236                                   | 9.7  | 48,670  | 90.3 | 53,906  | 8,858                                     | 15.0 | 50,070  | 85.0 | 58,928  |
| Total                              | 12,465                                  | 8.7  | 130,996 | 91.3 | 143,461 | 19,468                                    | 13.7 | 122,285 | 86.3 | 141,753 |
| <b>Nervous feelings</b>            |                                         |      |         |      |         |                                           |      |         |      |         |
| No                                 | 9,382                                   | 8.7  | 98,077  | 91.3 | 107,459 | 14,426                                    | 13.5 | 92,539  | 86.5 | 106,965 |
| Yes                                | 3,083                                   | 8.6  | 32,919  | 91.4 | 36,002  | 5,042                                     | 14.5 | 29,746  | 85.5 | 34,788  |
| Total                              | 12,465                                  | 8.7  | 130,996 | 91.3 | 143,461 | 19,468                                    | 13.7 | 122,285 | 86.3 | 141,753 |
| <b>Worrier / anxious feelings</b>  |                                         |      |         |      |         |                                           |      |         |      |         |
| No                                 | 5,090                                   | 9.1  | 50,801  | 90.9 | 55,891  | 7,444                                     | 13.3 | 48,569  | 86.7 | 56,013  |
| Yes                                | 7,375                                   | 8.4  | 80,195  | 91.6 | 87,570  | 12,024                                    | 14.0 | 73,716  | 86.0 | 85,740  |





|                                             |        |      |         |      |         |        |      |         |      |         |
|---------------------------------------------|--------|------|---------|------|---------|--------|------|---------|------|---------|
| < Every day                                 | 12,133 | 8.6  | 129,013 | 91.4 | 141,146 | 18,986 | 13.7 | 120,060 | 86.3 | 139,046 |
| Nearly every day                            | 332    | 14.3 | 1,983   | 85.7 | 2,315   | 482    | 17.8 | 2,225   | 82.2 | 2,707   |
| Total                                       | 12,465 | 8.7  | 130,996 | 91.3 | 143,461 | 19,468 | 13.7 | 122,285 | 86.3 | 141,753 |
| <b>Tiredness / lethargy in last 2 weeks</b> |        |      |         |      |         |        |      |         |      |         |
| < Every day                                 | 11,411 | 8.5  | 123,311 | 91.5 | 134,722 | 17,672 | 13.4 | 114,259 | 86.6 | 131,931 |
| Nearly every day                            | 1,054  | 12.1 | 7,685   | 87.9 | 8,739   | 1,796  | 18.3 | 8,026   | 81.7 | 9,822   |
| Total                                       | 12,465 | 8.7  | 130,996 | 91.3 | 143,461 | 19,468 | 13.7 | 122,285 | 86.3 | 141,753 |

Table S3: Descriptive statistics for the prospective samples

|                                   | Breast cancer screening trajectory |     |        |       | Cervical cancer screening trajectory |     |       |       |
|-----------------------------------|------------------------------------|-----|--------|-------|--------------------------------------|-----|-------|-------|
|                                   | Mean                               | SD  | N      | %     | Mean                                 | SD  | N     | %     |
| <b>Neuroticism</b>                |                                    |     |        |       |                                      |     |       |       |
| Up to date at both time points    | 4.1                                | 3.2 | 9 541  | 86.3  | 4.4                                  | 3.2 | 8 181 | 83.7  |
| Up to date at baseline only       | 4.1                                | 3.1 | 542    | 4.9   | 4.3                                  | 3.3 | 486   | 5.0   |
| Up to date at follow-up only      | 4.4                                | 3.2 | 783    | 7.1   | 4.6                                  | 3.3 | 282   | 2.9   |
| Up to date at neither time points | 3.7                                | 3.1 | 184    | 1.7   | 4.6                                  | 3.2 | 831   | 8.5   |
| Total                             | 4.1                                | 3.2 | 11 050 | 100.0 | 4.4                                  | 3.2 | 9 780 | 100.0 |
| <b>Depressive symptoms</b>        |                                    |     |        |       |                                      |     |       |       |
| Up to date at both time points    | 1.3                                | 1.8 | 9 541  | 86.3  | 1.6                                  | 1.9 | 8 181 | 83.7  |
| Up to date at baseline only       | 1.4                                | 1.8 | 542    | 4.9   | 1.8                                  | 2.2 | 486   | 5.0   |
| Up to date at follow-up only      | 1.7                                | 2.1 | 783    | 7.1   | 1.8                                  | 2.1 | 282   | 2.9   |
| Up to date at neither time points | 1.3                                | 2.0 | 184    | 1.7   | 1.9                                  | 2.3 | 831   | 8.5   |
| Total                             | 1.4                                | 1.8 | 11 050 | 100.0 | 1.6                                  | 2.0 | 9 780 | 100.0 |

N=number of individuals; SD=standard deviation

Table S4: Results from logistic regression models predicting whether participants were up to date with breast (N=143 461) and cervical (N=141 753) cancer screening at baseline in UK Biobank

|                                     | Breast cancer screening   |                           |                           | Cervical cancer screening |                           |                           |
|-------------------------------------|---------------------------|---------------------------|---------------------------|---------------------------|---------------------------|---------------------------|
|                                     | Model 1                   | Model 2                   | Model 3                   | Model 1                   | Model 2                   | Model 3                   |
|                                     | OR<br>[95% CI]            | OR<br>[95% CI]            | OR<br>[95% CI]            | OR<br>[95% CI]            | OR<br>[95% CI]            | OR<br>[95% CI]            |
| <b>Neuroticism score</b>            | 0.995<br>[0.989,1.001]    | 1.010**<br>[1.003,1.017]  | 1.009*<br>[1.002,1.016]   | 0.978***<br>[0.973,0.982] | 0.993*<br>[0.988,0.999]   | 0.989***<br>[0.983,0.994] |
| <b>Depressive symptoms</b>          |                           | 0.960***<br>[0.950,0.970] | 0.966***<br>[0.956,0.977] |                           | 0.958***<br>[0.950,0.966] | 0.972***<br>[0.964,0.980] |
| <b>Ethnicity (ref=White)</b>        |                           |                           |                           |                           |                           |                           |
| Mixed or Other                      | 0.653***<br>[0.563,0.758] | 0.668***<br>[0.576,0.775] | 0.696***<br>[0.600,0.808] | 0.934<br>[0.825,1.058]    | 0.957<br>[0.844,1.084]    | 1.032<br>[0.910,1.170]    |
| South Asian                         | 0.500***<br>[0.431,0.581] | 0.521***<br>[0.449,0.605] | 0.550***<br>[0.473,0.641] | 0.815**<br>[0.715,0.929]  | 0.848*<br>[0.744,0.967]   | 0.983<br>[0.860,1.123]    |
| Black                               | 0.713***<br>[0.615,0.827] | 0.732***<br>[0.631,0.849] | 0.741***<br>[0.638,0.860] | 1.188*<br>[1.039,1.359]   | 1.216**<br>[1.063,1.391]  | 1.415***<br>[1.236,1.621] |
| Chinese                             | 0.798<br>[0.566,1.125]    | 0.814<br>[0.578,1.148]    | 0.866<br>[0.613,1.223]    | 0.951<br>[0.719,1.259]    | 0.972<br>[0.734,1.286]    | 1.030<br>[0.778,1.365]    |
| <b>Education Level (ref=Degree)</b> |                           |                           |                           |                           |                           |                           |
| A-Levels                            | 0.997<br>[0.937,1.062]    | 0.997<br>[0.937,1.062]    | 1.012<br>[0.951,1.078]    | 0.929**<br>[0.883,0.977]  | 0.930**<br>[0.884,0.978]  | 0.964<br>[0.916,1.014]    |
| O-Levels                            | 1.119***<br>[1.061,1.179] | 1.119***<br>[1.062,1.180] | 1.148***<br>[1.089,1.211] | 0.847***<br>[0.813,0.883] | 0.848***<br>[0.814,0.884] | 0.900***<br>[0.863,0.938] |
| Certificate of Secondary Education  | 0.963<br>[0.881,1.053]    | 0.966<br>[0.884,1.056]    | 0.998<br>[0.912,1.091]    | 0.797***<br>[0.745,0.852] | 0.801***<br>[0.749,0.857] | 0.868***<br>[0.812,0.929] |
| National Vocational Qualification   | 1.051<br>[0.957,1.154]    | 1.060<br>[0.965,1.164]    | 1.112*<br>[1.012,1.222]   | 0.766***<br>[0.711,0.825] | 0.773***<br>[0.718,0.833] | 0.842***<br>[0.781,0.907] |
| Other                               | 1.060<br>[0.974,1.154]    | 1.063<br>[0.976,1.157]    | 1.091*<br>[1.002,1.187]   | 0.784***<br>[0.732,0.840] | 0.788***<br>[0.736,0.844] | 0.838***<br>[0.782,0.898] |
| None                                | 1.038<br>[0.978,1.103]    | 1.047<br>[0.986,1.112]    | 1.115***<br>[1.048,1.185] | 0.793***<br>[0.753,0.835] | 0.802***<br>[0.762,0.845] | 0.892***<br>[0.847,0.941] |
| <b>Region (ref=England)</b>         |                           |                           |                           |                           |                           |                           |

|                                        |                           |                           |                           |                           |                           |                           |
|----------------------------------------|---------------------------|---------------------------|---------------------------|---------------------------|---------------------------|---------------------------|
| Scotland                               | 0.815***<br>[0.762,0.872] | 0.815***<br>[0.762,0.872] | 0.819***<br>[0.766,0.876] | 1.159***<br>[1.091,1.231] | 1.158***<br>[1.091,1.231] | 1.171***<br>[1.102,1.244] |
| Wales                                  | 0.981<br>[0.892,1.078]    | 0.987<br>[0.897,1.085]    | 0.992<br>[0.902,1.091]    | 1.022<br>[0.948,1.100]    | 1.028<br>[0.954,1.107]    | 1.060<br>[0.983,1.142]    |
| <b>Long-standing illness (ref=No)</b>  |                           |                           |                           |                           |                           |                           |
| Yes                                    | 0.925***<br>[0.887,0.964] | 0.950*<br>[0.911,0.991]   | 0.974<br>[0.933,1.017]    | 0.700***<br>[0.678,0.724] | 0.721***<br>[0.697,0.746] | 0.787***<br>[0.761,0.815] |
| <b>Socioeconomic deprivation</b>       | 0.955***<br>[0.949,0.961] | 0.957***<br>[0.951,0.963] | 0.964***<br>[0.958,0.971] | 0.984***<br>[0.979,0.989] | 0.987***<br>[0.981,0.992] | 0.997<br>[0.991,1.002]    |
| <b>Smoking (ref=Never)</b>             |                           |                           |                           |                           |                           |                           |
| Current                                |                           |                           | 0.965<br>[0.924,1.007]    |                           |                           | 1.063***<br>[1.026,1.100] |
| Previous                               |                           |                           | 0.685***<br>[0.643,0.731] |                           |                           | 0.827***<br>[0.785,0.871] |
| <b>Alcohol consumption (ref=Daily)</b> |                           |                           |                           |                           |                           |                           |
| 3-4 times/week                         |                           |                           | 1.029<br>[0.966,1.096]    |                           |                           | 1.012<br>[0.960,1.066]    |
| 1-2 times/week                         |                           |                           | 0.985<br>[0.927,1.047]    |                           |                           | 0.962<br>[0.914,1.011]    |
| 1-3 times/month                        |                           |                           | 0.906**<br>[0.843,0.973]  |                           |                           | 0.847***<br>[0.799,0.897] |
| Special occasions only                 |                           |                           | 0.856***<br>[0.798,0.917] |                           |                           | 0.773***<br>[0.730,0.818] |
| Never                                  |                           |                           | 0.792***<br>[0.732,0.856] |                           |                           | 0.679***<br>[0.636,0.724] |
| <b>Body Mass Index</b>                 |                           |                           | 1.002<br>[0.998,1.006]    |                           |                           | 0.974***<br>[0.971,0.977] |

CI=Confidence interval; N=number of individuals. \*  $p < 0.05$ , \*\*  $p < 0.01$ , \*\*\*  $p < 0.001$ .

Model 1: Neuroticism score, age group, ethnicity, education level, region, long-standing illness and socioeconomic deprivation

Model 2: Model 1 + depressive symptoms

Model 3: Model 2 + smoking + alcohol consumption + BMI

Table S5: Results from logistic regression models predicting whether participants were up to date with breast (N=11 050) and cervical (N=9 780) cancer screening at follow-up in UK Biobank

|                                                       | Breast cancer screening   |                           |                           | Cervical cancer screening |                              |                              |
|-------------------------------------------------------|---------------------------|---------------------------|---------------------------|---------------------------|------------------------------|------------------------------|
|                                                       | Model 1                   | Model 2                   | Model 3                   | Model 1                   | Model 2                      | Model 3                      |
|                                                       | OR<br>[95% CI]            | OR<br>[95% CI]            | OR<br>[95% CI]            | OR<br>[95% CI]            | OR<br>[95% CI]               | OR<br>[95% CI]               |
| <b>Neuroticism</b>                                    | 1.018<br>[0.989,1.048]    | 1.017<br>[0.987,1.047]    | 1.016<br>[0.987,1.047]    | 1.016<br>[0.993,1.038]    | 1.020<br>[0.991,1.050]       | 1.017<br>[0.988,1.047]       |
| <b>Depressive symptoms</b>                            | 0.988<br>[0.940,1.039]    | 0.995<br>[0.946,1.047]    | 1.001<br>[0.951,1.053]    | 0.942***<br>[0.911,0.975] | 0.955*<br>[0.913,0.999]      | 0.963<br>[0.920,1.007]       |
| <b>Up to date with screening at baseline (ref=No)</b> |                           |                           |                           |                           |                              |                              |
| Yes                                                   |                           | 4.765***<br>[3.901,5.822] | 4.742***<br>[3.881,5.795] |                           | 55.531***<br>[46.696,66.039] | 54.632***<br>[45.918,65.001] |
| <b>Ethnicity (ref=White)</b>                          |                           |                           |                           |                           |                              |                              |
| Non-white                                             | 0.413***<br>[0.273,0.624] | 0.433***<br>[0.283,0.664] | 0.463***<br>[0.301,0.713] | 0.698*<br>[0.508,0.960]   | 0.580*<br>[0.380,0.886]      | 0.605*<br>[0.394,0.929]      |
| <b>Education Level (ref=Degree)</b>                   |                           |                           |                           |                           |                              |                              |
| Non-degree                                            | 1.232**<br>[1.056,1.436]  | 1.230**<br>[1.053,1.438]  | 1.241**<br>[1.060,1.452]  | 0.919<br>[0.816,1.035]    | 0.928<br>[0.795,1.084]       | 0.957<br>[0.818,1.120]       |
| <b>Region (ref=England)</b>                           |                           |                           |                           |                           |                              |                              |
| Outside England                                       | 0.717<br>[0.477,1.077]    | 0.755<br>[0.495,1.151]    | 0.750<br>[0.492,1.144]    | 1.203<br>[0.820,1.765]    | 0.824<br>[0.520,1.305]       | 0.821<br>[0.519,1.300]       |
| <b>Long-standing illness (ref=No)</b>                 |                           |                           |                           |                           |                              |                              |
| Yes                                                   | 1.033<br>[0.863,1.235]    | 1.029<br>[0.858,1.235]    | 1.023<br>[0.851,1.230]    | 0.663***<br>[0.580,0.757] | 0.712***<br>[0.595,0.851]    | 0.753**<br>[0.627,0.904]     |
| <b>Socioeconomic</b>                                  | 0.944***                  | 0.948***                  | 0.951***                  | 0.994                     | 1.014                        | 1.019                        |

|                                                |               |               |                         |               |               |                          |
|------------------------------------------------|---------------|---------------|-------------------------|---------------|---------------|--------------------------|
| <b>deprivation</b>                             | [0.918,0.971] | [0.921,0.975] | [0.924,0.979]           | [0.973,1.017] | [0.984,1.044] | [0.989,1.050]            |
| <b>Smoking<br/>(ref=Never)</b>                 |               |               |                         |               |               |                          |
| Current                                        |               |               | 1.062<br>[0.892,1.265]  |               |               | 0.972<br>[0.816,1.159]   |
| Previous                                       |               |               | 0.674*<br>[0.491,0.923] |               |               | 0.953<br>[0.684,1.327]   |
| <b>Alcohol<br/>consumption<br/>(ref=Daily)</b> |               |               |                         |               |               |                          |
| Regularly                                      |               |               | 1.084<br>[0.878,1.340]  |               |               | 0.870<br>[0.691,1.095]   |
| Occasionally                                   |               |               | 0.920<br>[0.722,1.173]  |               |               | 0.866<br>[0.668,1.123]   |
| Never                                          |               |               | 0.692*<br>[0.494,0.970] |               |               | 0.738<br>[0.508,1.071]   |
| <b>Body Mass<br/>Index</b>                     |               |               | 1.015<br>[0.998,1.033]  |               |               | 0.978**<br>[0.963,0.993] |

CI=Confidence interval; N=number of individuals. \*  $p < 0.05$ , \*\*  $p < 0.01$ , \*\*\*  $p < 0.001$ .

Model 1: Neuroticism score, depressive symptoms, age group, ethnicity, education level, region, long-standing illness, socioeconomic deprivation and years between baseline and follow-up

Model 2: Model 1 + baseline cancer screening

Model 3: Model 2 + smoking + alcohol consumption + BMI

Table S6: Results from multinomial logistic regression models (referent category is up to date at both time points) predicting the pattern of breast cancer screening from baseline to follow-up in UK Biobank (N= 11 050)

|                                       | Up to date at baseline only |                           | Up to date at follow-up only |                           | Up to date at neither time point |                          |
|---------------------------------------|-----------------------------|---------------------------|------------------------------|---------------------------|----------------------------------|--------------------------|
|                                       | Model 1                     | Model 2                   | Model 1                      | Model 2                   | Model 1                          | Model 2                  |
|                                       | RRR<br>[95% CI]             | RRR<br>[95% CI]           | RRR<br>[95% CI]              | RRR<br>[95% CI]           | RRR<br>[95% CI]                  | RRR<br>[95% CI]          |
| <b>Neuroticism score</b>              | 0.988<br>[0.956,1.021]      | 0.989<br>[0.957,1.023]    | 0.996<br>[0.968,1.025]       | 0.998<br>[0.970,1.027]    | 0.963<br>[0.909,1.019]           | 0.961<br>[0.907,1.017]   |
| <b>Depressive symptoms</b>            | 1.023<br>[0.967,1.083]      | 1.016<br>[0.959,1.076]    | 1.049*<br>[1.002,1.098]      | 1.047<br>[1.000,1.096]    | 0.998<br>[0.901,1.105]           | 0.999<br>[0.902,1.106]   |
| <b>Age group (ref=50-54 years)</b>    |                             |                           |                              |                           |                                  |                          |
| 55-59 years                           | 1.035<br>[0.834,1.285]      | 1.039<br>[0.837,1.290]    | 0.144***<br>[0.118,0.177]    | 0.146***<br>[0.119,0.179] | 0.590**<br>[0.415,0.840]         | 0.591**<br>[0.415,0.843] |
| 60-64 years                           | 1.101<br>[0.860,1.408]      | 1.112<br>[0.868,1.423]    | 0.093***<br>[0.070,0.122]    | 0.094***<br>[0.071,0.124] | 0.537**<br>[0.357,0.808]         | 0.545**<br>[0.361,0.822] |
| 65+ years                             | 2.640***<br>[1.719,4.053]   | 2.673***<br>[1.739,4.108] | 0.168***<br>[0.095,0.299]    | 0.171***<br>[0.096,0.303] | 1.420<br>[0.753,2.679]           | 1.453<br>[0.768,2.748]   |
| <b>Ethnicity (ref=White)</b>          |                             |                           |                              |                           |                                  |                          |
| Non-white                             | 2.148**<br>[1.305,3.537]    | 2.030**<br>[1.227,3.359]  | 1.184<br>[0.720,1.949]       | 1.184<br>[0.717,1.955]    | 3.456***<br>[1.756,6.802]        | 3.119**<br>[1.569,6.196] |
| <b>Education level (ref=Degree)</b>   |                             |                           |                              |                           |                                  |                          |
| Non-degree                            | 0.860<br>[0.720,1.026]      | 0.853<br>[0.714,1.021]    | 1.017<br>[0.872,1.187]       | 1.019<br>[0.872,1.191]    | 0.691*<br>[0.512,0.931]          | 0.683*<br>[0.505,0.923]  |
| <b>Region (ref=England)</b>           |                             |                           |                              |                           |                                  |                          |
| Outside of England                    | 1.126<br>[0.699,1.815]      | 1.141<br>[0.708,1.839]    | 1.063<br>[0.681,1.661]       | 1.067<br>[0.683,1.668]    | 2.812**<br>[1.331,5.942]         | 2.798**<br>[1.321,5.927] |
| <b>Long-standing illness (ref=No)</b> |                             |                           |                              |                           |                                  |                          |
| Yes                                   | 1.126<br>[0.699,1.815]      | 1.141<br>[0.708,1.839]    | 1.063<br>[0.681,1.661]       | 1.067<br>[0.683,1.668]    | 2.812**<br>[1.331,5.942]         | 2.798**<br>[1.321,5.927] |
| <b>Socioeconomic deprivation</b>      | 1.018<br>[0.831,1.248]      | 1.014<br>[0.824,1.246]    | 1.021<br>[0.852,1.224]       | 1.014<br>[0.843,1.218]    | 0.827<br>[0.574,1.192]           | 0.856<br>[0.592,1.238]   |
|                                       | 1.067***<br>[1.033,1.101]   | 1.063***<br>[1.029,1.098] | 1.033*<br>[1.004,1.063]      | 1.034*<br>[1.005,1.064]   | 1.049<br>[0.993,1.109]           | 1.046<br>[0.989,1.105]   |

|                                        |  |                         |  |                        |                          |
|----------------------------------------|--|-------------------------|--|------------------------|--------------------------|
| <b>Smoking (ref=Never)</b>             |  |                         |  |                        |                          |
| Previous                               |  | 0.873<br>[0.716,1.065]  |  | 0.848<br>[0.712,1.011] | 1.080<br>[0.777,1.501]   |
| Current                                |  | 1.521*<br>[1.075,2.153] |  | 1.062<br>[0.761,1.482] | 1.403<br>[0.740,2.660]   |
| <b>Alcohol consumption (ref=Daily)</b> |  |                         |  |                        |                          |
| Regularly                              |  | 0.895<br>[0.706,1.133]  |  | 1.006<br>[0.811,1.249] | 1.017<br>[0.668,1.547]   |
| Occasionally                           |  | 0.992<br>[0.754,1.305]  |  | 1.025<br>[0.799,1.314] | 1.489<br>[0.933,2.374]   |
| Never                                  |  | 1.328<br>[0.906,1.946]  |  | 0.969<br>[0.660,1.423] | 1.833<br>[0.972,3.457]   |
| <b>Body Mass Index</b>                 |  | 0.995<br>[0.976,1.014]  |  | 1.005<br>[0.989,1.021] | 0.949**<br>[0.916,0.984] |

CI=Confidence interval; RRR=Relative Risk Ratio. \*  $p < 0.05$ , \*\*  $p < 0.01$ , \*\*\*  $p < 0.001$ .

Model 1: Neuroticism score, depressive symptoms, age group, ethnicity, education level, region, long-standing illness, socioeconomic deprivation and years between baseline and follow-up

Model 2: Model 1 + smoking + alcohol consumption + BMI



Table S7: Results from multinomial logistic regression models (referent category is up to date at both time points) predicting the trajectory of cervical cancer screening from baseline to follow-up in UK Biobank (N=9 780)

|                                       | Up to date at baseline only |                         | Up to date at follow-up only |                           | Up to date at neither time point |                           |
|---------------------------------------|-----------------------------|-------------------------|------------------------------|---------------------------|----------------------------------|---------------------------|
|                                       | Model 1                     | Model 2                 | Model 1                      | Model 2                   | Model 1                          | Model 2                   |
|                                       | RRR<br>[95% CI]             | RRR<br>[95% CI]         | RRR<br>[95% CI]              | RRR<br>[95% CI]           | RRR<br>[95% CI]                  | RRR<br>[95% CI]           |
| <b>Neuroticism</b>                    | 0.973<br>[0.940,1.008]      | 0.976<br>[0.943,1.011]  | 0.994<br>[0.951,1.040]       | 0.998<br>[0.954,1.044]    | 0.991<br>[0.965,1.018]           | 0.998<br>[0.971,1.025]    |
| <b>Depressive symptoms</b>            | 1.060*<br>[1.005,1.118]     | 1.051<br>[0.996,1.109]  | 1.049<br>[0.980,1.124]       | 1.036<br>[0.966,1.111]    | 1.065**<br>[1.022,1.109]         | 1.046*<br>[1.003,1.090]   |
| <b>Age group (ref=40-44 years)</b>    |                             |                         |                              |                           |                                  |                           |
| 45-49 years                           | 0.721*<br>[0.540,0.962]     | 0.717*<br>[0.537,0.957] | 1.182<br>[0.889,1.571]       | 1.172<br>[0.881,1.559]    | 1.270<br>[0.981,1.644]           | 1.276<br>[0.984,1.653]    |
| 50-54 years                           | 1.230<br>[0.954,1.587]      | 1.201<br>[0.930,1.551]  | 0.226***<br>[0.147,0.347]    | 0.219***<br>[0.142,0.337] | 1.624***<br>[1.272,2.073]        | 1.608***<br>[1.258,2.056] |
| 55-59 years                           | 1.008<br>[0.738,1.377]      | 0.978<br>[0.715,1.339]  | 0.384***<br>[0.250,0.589]    | 0.372***<br>[0.242,0.572] | 2.228***<br>[1.723,2.881]        | 2.252***<br>[1.739,2.917] |
| >60 years                             | 0.967<br>[0.474,1.973]      | 0.932<br>[0.456,1.904]  | 0.374*<br>[0.143,0.976]      | 0.354*<br>[0.135,0.927]   | 3.029***<br>[2.031,4.519]        | 2.967***<br>[1.984,4.435] |
| <b>Ethnicity (ref=White)</b>          |                             |                         |                              |                           |                                  |                           |
| Non-white                             | 1.623*<br>[1.028,2.560]     | 1.606*<br>[1.012,2.551] | 0.657<br>[0.304,1.423]       | 0.655<br>[0.300,1.428]    | 1.280<br>[0.851,1.925]           | 1.173<br>[0.776,1.773]    |
| <b>Education level (ref=Degree)</b>   |                             |                         |                              |                           |                                  |                           |
| Non-degree                            | 0.991<br>[0.823,1.193]      | 0.958<br>[0.794,1.155]  | 0.863<br>[0.678,1.098]       | 0.830<br>[0.650,1.059]    | 1.142<br>[0.986,1.322]           | 1.072<br>[0.924,1.244]    |
| <b>Region (ref=England)</b>           |                             |                         |                              |                           |                                  |                           |
| Outside of England                    | 0.948<br>[0.569,1.577]      | 0.933<br>[0.561,1.552]  | 0.276**<br>[0.107,0.714]     | 0.271**<br>[0.105,0.701]  | 0.673<br>[0.388,1.167]           | 0.664<br>[0.383,1.154]    |
| <b>Long-standing illness (ref=No)</b> |                             |                         |                              |                           |                                  |                           |
| Yes                                   | 1.288*<br>[1.035,1.603]     | 1.217<br>[0.974,1.519]  | 0.937<br>[0.687,1.278]       | 0.880<br>[0.642,1.206]    | 1.636***<br>[1.394,1.921]        | 1.474***<br>[1.251,1.738] |
| <b>Socioeconomic deprivation</b>      | 0.985                       | 0.979                   | 1.030                        | 1.024                     | 1.020                            | 1.010                     |

|                                        |               |                           |               |                           |               |                           |
|----------------------------------------|---------------|---------------------------|---------------|---------------------------|---------------|---------------------------|
|                                        | [0.951,1.020] | [0.944,1.015]             | [0.987,1.076] | [0.979,1.070]             | [0.993,1.048] | [0.983,1.039]             |
| <b>Smoking (ref=Never)</b>             |               |                           |               |                           |               |                           |
| Previous                               |               | 1.107<br>[0.900,1.363]    |               | 1.010<br>[0.765,1.334]    |               | 0.876<br>[0.740,1.038]    |
| Current                                |               | 1.044<br>[0.701,1.556]    |               | 0.972<br>[0.587,1.610]    |               | 1.035<br>[0.758,1.412]    |
| <b>Alcohol consumption (ref=Daily)</b> |               |                           |               |                           |               |                           |
| Regularly                              |               | 1.165<br>[0.885,1.533]    |               | 1.008<br>[0.709,1.433]    |               | 1.123<br>[0.896,1.409]    |
| Occasionally                           |               | 1.035<br>[0.753,1.421]    |               | 1.022<br>[0.686,1.522]    |               | 1.517***<br>[1.187,1.939] |
| Never                                  |               | 1.250<br>[0.795,1.964]    |               | 0.905<br>[0.472,1.733]    |               | 1.465*<br>[1.035,2.073]   |
| <b>Body Mass Index</b>                 |               | 1.032***<br>[1.014,1.051] |               | 1.043***<br>[1.019,1.067] |               | 1.043***<br>[1.029,1.057] |

CI=Confidence interval; RRR=Relative Risk Ratio. \*  $p < 0.05$ , \*\*  $p < 0.01$ , \*\*\*  $p < 0.001$ .

Model 1: Neuroticism score, depressive symptoms, age group, ethnicity, education level, region, long-standing illness, socioeconomic deprivation and years between baseline and follow-up

Model 2: Model 1 + smoking + alcohol consumption + BMI

## References

1. UK Biobank. Repeat Assessment Data. Available at: [https://biobank.ctsu.ox.ac.uk/~bbdatan/Repeat\\_assessment\\_doc\\_v1.0.pdf](https://biobank.ctsu.ox.ac.uk/~bbdatan/Repeat_assessment_doc_v1.0.pdf). 2013.
2. UK Biobank. Repeat Assessment: Participant Characteristics of responders vs. non-responders. Available at: [http://biobank.ctsu.ox.ac.uk/~bbdatan/repeat\\_assessment\\_characteristics\\_v1.pdf](http://biobank.ctsu.ox.ac.uk/~bbdatan/repeat_assessment_characteristics_v1.pdf). 2014.
3. Martin A, Rief W, Klaiberg A, Braehler E. Validity of the Brief Patient Health Questionnaire Mood Scale (PHQ-9) in the general population. *General Hospital Psychiatry*. 2006;28(1):71-77.
4. Kroenke K, Spitzer RL, Williams JB, Löwe B. An ultra-brief screening scale for anxiety and depression: the PHQ-4. *Psychosomatics*. 2009;50(6):613-621.
5. Lyall LM, Wyse CA, Celis-Morales CA, et al. Seasonality of depressive symptoms in women but not in men: A cross-sectional study in the UK Biobank cohort. *Journal of Affective Disorders*. 2018;229:296-305.
6. Townsend P. Deprivation. *Journal of social policy*. 1987;16(2):125-146.
